# Supplementary material
Source: PubMed Central journal article supplement (PMC5858650)
Supplement: DS_10.1177_2380084417750612.pdf [file DS_10.1177_2380084417750612.pdf]

# School-Based Caries Prevention, Tooth Decay, and the Community Environment

R.R. Ruff and R. Niederman

## Appendix

Appendix Table: Multilevel model results for TOCE stratified by primary and permanent dentition

| <i>Direct effects</i> | Primary     |        |      | Permanent   |        |      |
|-----------------------|-------------|--------|------|-------------|--------|------|
|                       | IRR         | 95% CI |      | IRR         | 95% CI |      |
| Gender                | 0.94        | 0.86   | 1.02 | <b>1.20</b> | 1.05   | 1.38 |
| Prevention over time  | <b>1.17</b> | 1.15   | 1.19 | <b>1.05</b> | 1.02   | 1.07 |
| Standardized FRL      | <b>1.19</b> | 1.11   | 1.29 | <b>1.62</b> | 1.40   | 1.87 |
| Previous Care         | <b>3.80</b> | 3.47   | 4.17 | <b>3.50</b> | 2.98   | 4.10 |
| Age at exam           | <b>1.35</b> | 1.24   | 1.49 | <b>4.86</b> | 3.93   | 6.00 |
| Quadratic age         | <b>0.98</b> | 0.97   | 0.98 | <b>0.93</b> | 0.92   | 0.94 |
